# Supplementary material for: Red-Mediated Transposition and Final Release of the Mini-F Vector of a Cloned Infectious Herpesvirus Genome
Source: PubMed Central journal article supplement (PMC2780728; doi:10.1371/journal.pone.0008178), 2009-12-04
Supplement: pone.0008178.s004.pdf [file pone.0008178.s004.pdf]

**A) Detection**

| Primer    | Sequence (5' - 3')      | Primer    | Sequence (5' - 3')     |
|-----------|-------------------------|-----------|------------------------|
| <b>P1</b> | CTTCGACCCGTCTTCCTTCC    | <b>P3</b> | TGCCACTCATCGCAGTACTG   |
| <b>P2</b> | AGGTGTTTCGGGAATCTGATAGC | <b>P4</b> | AGGCATTTTCAGTCAGTTGCTC |

**B) Cloning**

| Primer   | Sequence (5' - 3')               | Primer   | Sequence (5' - 3')               |
|----------|----------------------------------|----------|----------------------------------|
| <b>A</b> | TACGCTCGAGGATCCTACTCGAGGTCA      | <b>I</b> | ACTAGTTATCGTTCTCGCCCATTATACG     |
| <b>B</b> | TGACCTCGAGTAGGATCCTCGAGCGTA      | <b>J</b> | ACTAGTTTTCGGCTAATTAAATAAACGGAG   |
| <b>C</b> | TACGCTCGAGCATGCTACTCGAGGTCA      | <b>K</b> | GACTAGTTACACGTGATACTGAGACAAAAGCG |
| <b>D</b> | GACCTCGAGTAGCATGCTCGAGCGTA       | <b>L</b> | GACTAGTGGGAGGATGAGGCTGTGAGA      |
| <b>E</b> | ACTAGTTATGTGTGCTCTTGTGATCTCCC    | <b>M</b> | CGCGTCGACCCTGCCGCAGAACCCTCGTGC   |
| <b>F</b> | ACTAGTAACCTTGTAAACGCGTATAAGTTCCG | <b>N</b> | CGCGTCGACCCTAGGGGGCCCCCTCCCCGGGG |
| <b>G</b> | ACTAGTATTGTGGGGGAGTATAATTGTCC    | <b>O</b> | GACTAGTGGATCCAGGGGGGCCAGCCCTCTC  |
| <b>H</b> | ACTAGTATTAACACGTGTATATAATGCGCC   | <b>P</b> | GACTAGTCGTCCGCGCAACTGAAAATG      |

**C) *En passant***

| Primer   | Sequence (5' - 3')                                                                                                     |
|----------|------------------------------------------------------------------------------------------------------------------------|
| <b>Q</b> | ATAAATACCTGTGACGGAAGATCACTTCGCAGAATAAATAAATCCCGATTTATTCAACAAAGCCACGT                                                   |
| <b>R</b> | TTACGTTATTATTAAATAAAAACATGTAGACATTATTAATAATCCTAGGAACAATCAAATCCATATTTGTAA<br>TTATGTTTTAACCCCTCCCTAGGGATAACAGGGTAATGCCAG |

**Table S1: Detection (A), Cloning (B) and *En passant* (C) primers used in this study.**
